## Research Article

# Effect of rs4646994 polymorphism of angiotensin-converting enzyme on the risk of nonischemic cardiomyopathy

Jinsheng Shen<sup>1,\*</sup>, Xuesong Qian<sup>2,\*</sup>, Xiaofei Mei<sup>3,\*</sup>, Jialu Yao<sup>3</sup>, Hezi Jiang<sup>3</sup>, Kexin Li<sup>3</sup>, Tan Chen<sup>3</sup>, Yufeng Jiang<sup>3</sup> and  Yafeng Zhou<sup>1,3</sup>

<sup>1</sup>Department of Cardiology, The First Affiliated Hospital of Soochow University, Suzhou City 215006, P.R. China; <sup>2</sup>Department of Cardiology, The First People's Hospital of Zhangjiagang city of Soochow University, Suzhou City, 215638, P.R. China; <sup>3</sup>Department of Cardiology, Dushu Lake Hospital Affiliated to Soochow University (Suzhou Dushu Lake Hospital), Suzhou City 215123, P.R. China

**Correspondence:** Yafeng Zhou (zhouyafeng73@126.com) or Yufeng Jiang (yufeng\_jiang@hotmail.com)

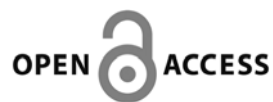

**Background:** Angiotensin-converting enzyme (ACE) gene polymorphisms have recently been shown to be associated with risk of developing left ventricular hypertrophy (LVH). However, the results were controversial. We aimed to conduct this meta-analysis to further confirm the association between ACE rs4646994 polymorphism and hypertrophic cardiomyopathy (HCM)/dilated cardiomyopathy (DCM).

**Methods:** PubMed, Embase, the Chinese National Knowledge Information, and Wanfang databases were searched for eligible studies. The Newcastle–Ottawa Scale (NOS) was used to evaluate the quality of included studies. Then we evaluated the association between ACE gene mutation and HCM/DCM by calculating odds ratios (ORs) and 95% confidence intervals (95% CIs). Subgroup analysis was further performed to explore situations in specialized subjects. Sensitivity analysis and publication bias was assessed to confirm the study reliability.

**Results:** There were 13 studies on DCM (2004 cases and 1376 controls) and 16 studies on HCM (2161 controls and 1192 patients). ACE rs4646994 polymorphism was significantly associated with DCM in all genetic models. However, in HCM, four genetic models (allele model, homozygous model, heterozygous model, and dominant model) showed significant association between ACE rs4646994 polymorphism and DCM. In subgroup analysis, we found that ACE rs4646994 polymorphism was significantly associated with DCM/HCM in Asian population. Finally, we also conducted a cumulative meta-analysis, which indicates that the results of our meta-analysis are highly reliable.

**Conclusion:** ACE rs4646994 polymorphism increases the risk of DCM/HCM in Asians, but not in Caucasians. More case–control studies are needed to strengthen our conclusions and to assess the gene–gene and gene–environment interactions between ACE rs4646994 polymorphism and DCM/HCM.

\*These authors contributed equally to this work and should be considered co-first authors.

Received: 15 July 2021  
Revised: 12 October 2021  
Accepted: 27 October 2021

Accepted Manuscript online:  
08 November 2021  
Version of Record published:  
17 December 2021

## Introduction

Cardiomyopathy is a kind of heterogeneous myocardial disease, resulting from pathological changes in the myocardium of different etiologies, manifesting as ventricular hypertrophy or dilation. Myocardial dysfunction due to other cardiovascular diseases is not part of the spectrum of the disease, such as valvular heart disease, hypertensive heart disease, congenital heart disease, coronary heart disease, or congenital heart disease [1,2]. It can eventually lead to progressive heart failure,

arrhythmia, thromboembolism and sudden death, and has a poor prognosis. Cardiomyopathy can be generally classified into hypertrophic cardiomyopathy (HCM), dilated cardiomyopathy (DCM), restrictive cardiomyopathy (RCM), arrhythmogenic right ventricular cardiomyopathy (ARVC), and left ventricular noncompaction (LVNC). Among them, HCM and DCM are the main types of cardiomyopathy [3]. Many previous clinical studies recognized that cardiomyopathy has a familial origin, suggesting that genetic factors may play a crucial role in disease pathogenesis [4,5].

HCM and DCM are caused by mutant sarcomeric genes [6–8]. Mutations in sarcomeric protein genes can cause changes in myofilament tension that determine cardiac hypertrophy and dilation. Polymorphisms including genes encoding components of the renin–angiotensin system (RAS), such as angiotensin-converting enzyme (ACE), have recently been shown to be associated with the risk of developing left ventricular hypertrophy (LVH) [9,10] and thus may influence the clinical phenotype of HCM/DCM. The ACE gene is located on chromosome 17q23 and is characterized by a major insertion/deletion (rs4646994) polymorphism, consisting of a 289 base-pair Alu repeat sequence present or absent from intron 16 [11]. Past studies have shown that LVH is significantly increased in HCM and DCM patients with the ACE-D/D genotype and thus may be a genetic factor in the pathogenesis of HCM/DCM [12,13].

Over the past 20 years, numerous studies have reported the association of insertion/deletion polymorphisms of the angiotensin I-converting enzyme gene (ACE rs4646994) with HCM and DCM. But their results are inconsistent, especially the association with DCM, which is currently controversial [14]. Therefore, we conducted this meta-analysis to further confirm the association between ACE rs4646994 polymorphism and HCM/DCM.

## Methods

We followed Preferred Reporting Items for Systematic Reviews and Meta-Analyses (PRISMA) guidelines (<http://prisma-statement.org/>) in conducting the systematic review and meta-analysis.

### Search strategy

As of March 2021, we have used the terms ‘angiotensin converting enzyme’ or ‘ACE’, ‘polymorphism’ or ‘mutation’ and ‘hypertrophic cardiomyopathy’ and ‘dilated cardiomyopathy’ without language restrictions in PubMed, Embase, the Chinese National Knowledge Information, and Wanfang databases. Retrieved articles were reviewed to select related data of our interest. References included in the literature were also searched and reviewed to find other potentially eligible data.

### Inclusion criteria

The studies included in the meta-analysis must meet the following three criteria: (1) evaluating the association between ACE rs4646994 polymorphisms and HCM/DCM; (2) a case–control design was used, and (3) the data had to include the genotypes of II, ID, and DD, as well as comprehensive statistical indexes that were direct or indirect: odds ratio (OR) and 95% confidence interval (95% CI) and fulfilled the Hardy–Weinberg equilibrium (HWE) among the control groups.

### Exclusion criteria

All patients were excluded for potential influencing factors such as hypertension, hypertensive heart disease, coronary atherosclerotic heart disease, ischemic heart disease, ischemic cardiomyopathy, severe coronary obstruction for DCM valvular heart disease, valvular heart disease, congenital heart or vascular malformations, and inherent pulmonary disease.

### Data extraction

Two authors independently reviewed all the included studies and extracted vital data. Disagreements were resolved by a third researcher, and a common outcome was finally reached. We extracted the following information: first author, year of publication, country from which subjects came, ethnicity, number of cases and controls, allele and genotype frequencies, source of control group, diagnostic criteria, and HWE test. We attempted to contact the original authors if study data were incomplete. Study quality was assessed by the Newcastle–Ottawa Scale (NOS).

### Statistical methods

HWE was performed in the control group, and the significance level was set at  $P < 0.05$ . The association between ACE rs4646994 polymorphisms and HCM/DCM was assessed by fixed- or random-effects models incorporating

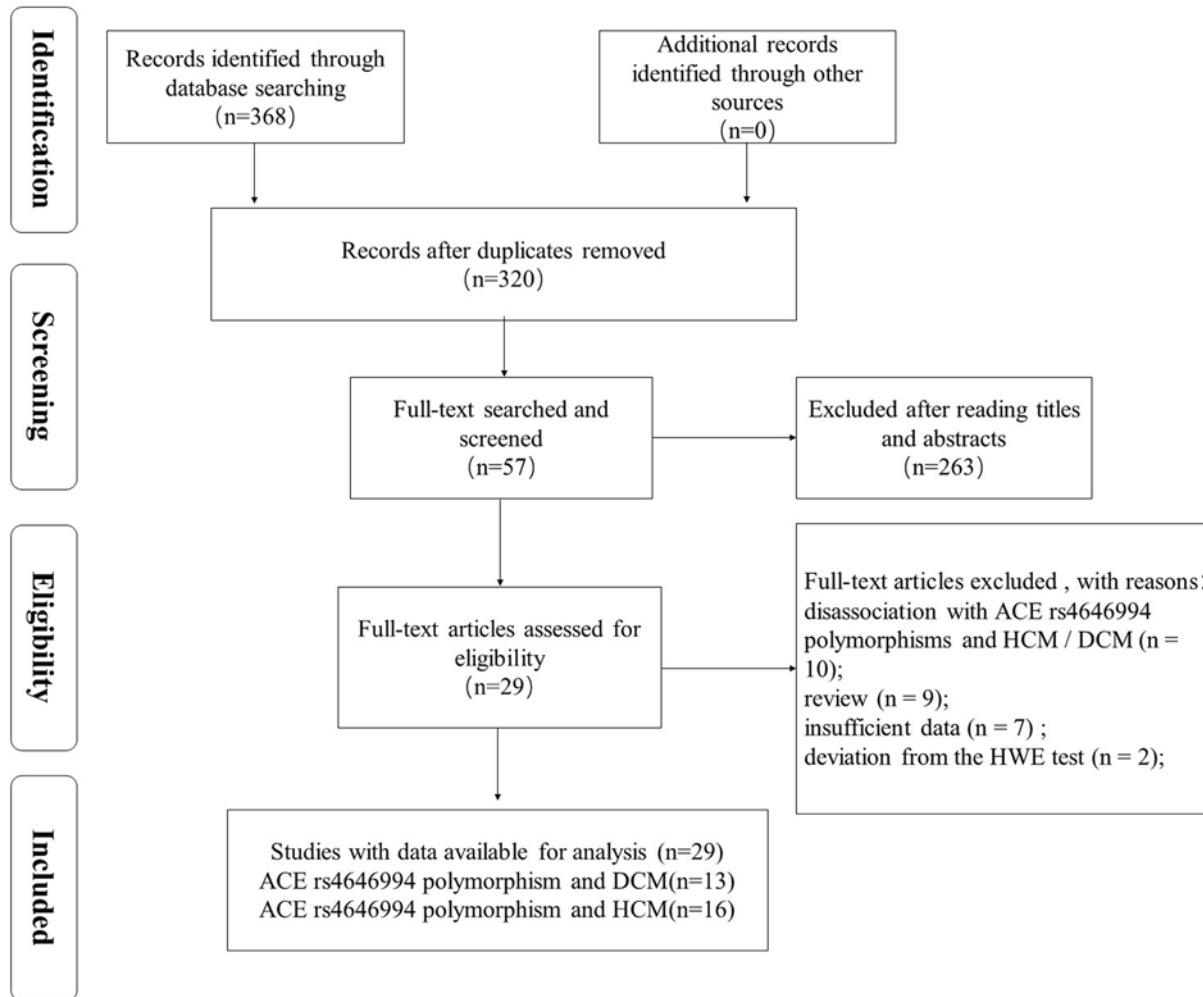

Figure 1. The PRISMA flow diagram of the study selection and exclusion

ORs and 95% CIs. We demonstrated the degree of heterogeneity between studies by using  $I^2$  ranging from 0% (complete agreement) to 100% (complete inconsistency). We used a random-effects model (Der Simonian and Laird method) for the pooled analysis, and  $I^2 > 50\%$  indicated heterogeneity among studies. Otherwise, a fixed-effects model (Mantel–Haenszel method) should be used. We also performed subgroup analysis to identify possible heterogeneity and cumulative meta-analysis to determine the reliability of the results. All analyses were performed in five genetic models: allelic model (d vs. I), homozygous model (DD vs. II), heterozygous model (ID vs. II), dominant model (ID + DD vs. II), and recessive model (DD vs. ID + II). Sensitivity analyses assessed the potential impact of individual study datasets on pooling or omitting studies. We also performed Egger's test and plotted Begg's funnel plot to determine publication bias, and concluded that there was no statistically significant publication bias when  $P > 0.05$ . All statistical tests were performed using Stata version 15.0 (Stata Corp, University of Texas).

## Results

### Research characteristics

Finally we found a total of 368 potential articles related to keywords, of which 48 duplicate studies were excluded. We then initially screened the remaining 320 articles, 263 of which were excluded. From the full-text reading of 57 articles, 28 were excluded because of their disassociation with ACE rs4646994 polymorphisms and HCM/DCM ( $n=10$ ), review ( $n=9$ ), insufficient data ( $n=7$ ), and deviation from the HWE test ( $n=2$ ). The entire process of exclusion and enrollment is shown in Figure 1. Finally, this meta-analysis included 13 studies on DCM [13,15–26] (2004 controls and 1376 cases, Table 1) and 16 studies on HCM [13,17,20,24,27–38] (2161 controls and 1192 patients, Table 2). The

**Table 1** The characteristics of included studies and ACE rs4646994 polymorphism genotype distribution and allele frequency of DCM in case and control groups

| Author              | Year | Country | Ethnicity | Sample size | Genotype (n) |     |     |       |          |     |     |       | Allele frequency (n, %) |     |      |          |     |      | NOS score | HWE test |
|---------------------|------|---------|-----------|-------------|--------------|-----|-----|-------|----------|-----|-----|-------|-------------------------|-----|------|----------|-----|------|-----------|----------|
|                     |      |         |           |             | Cases        |     |     |       | Controls |     |     |       | Cases                   |     |      | Controls |     |      |           |          |
|                     |      |         |           |             | II           | ID  | DD  | Total | II       | ID  | DD  | Total | I                       | D   | RAF  | I        | D   | RAF  |           |          |
| Montgomery et al.   | 1995 | U.K.    | Caucasian | 463         | 18           | 50  | 31  | 99    | 84       | 168 | 112 | 364   | 86                      | 112 | 0.57 | 336      | 392 | 0.54 | 6         | 0.173    |
| Sanderson et al.    | 1996 | China   | Asian     | 200         | 39           | 49  | 12  | 100   | 39       | 48  | 13  | 100   | 127                     | 73  | 0.37 | 126      | 74  | 0.37 | 6         | 0.767    |
| Yamada et al.       | 1997 | Japan   | Asian     | 210         | 36           | 35  | 17  | 88    | 50       | 55  | 17  | 122   | 107                     | 69  | 0.39 | 155      | 89  | 0.36 | 6         | 0.764    |
| Tiret et al.        | 2000 | France  | Caucasian | 809         | 94           | 200 | 128 | 422   | 71       | 190 | 126 | 387   | 388                     | 456 | 0.54 | 332      | 442 | 0.57 | 6         | 0.966    |
| Shan et al.         | 2001 | China   | Asian     | 238         | 27           | 25  | 31  | 83    | 50       | 80  | 25  | 155   | 79                      | 87  | 0.52 | 180      | 130 | 0.42 | 6         | 0.456    |
| Wu et al.           | 2002 | China   | Asian     | 106         | 14           | 22  | 7   | 43    | 23       | 28  | 12  | 63    | 50                      | 36  | 0.42 | 74       | 52  | 0.41 | 6         | 0.509    |
| Zou et al.          | 2005 | China   | Asian     | 96          | 12           | 18  | 13  | 43    | 28       | 20  | 5   | 53    | 42                      | 44  | 0.51 | 76       | 30  | 0.28 | 6         | 0.609    |
| Rai et al.          | 2008 | India   | Asian     | 215         | 8            | 33  | 10  | 51    | 47       | 87  | 30  | 164   | 49                      | 53  | 0.52 | 181      | 147 | 0.45 | 6         | 0.353    |
| Kucukarabaci et al. | 2008 | Turkey  | Caucasian | 49          | 5            | 18  | 6   | 29    | 7        | 9   | 4   | 20    | 28                      | 30  | 0.52 | 23       | 17  | 0.43 | 6         | 0.722    |
| Mahjoub et al.      | 2010 | Tunisia | Caucasian | 227         | 12           | 38  | 26  | 76    | 46       | 83  | 22  | 151   | 62                      | 90  | 0.59 | 175      | 127 | 0.42 | 6         | 0.116    |
| Kong et al.         | 2012 | China   | Asian     | 206         | 20           | 49  | 32  | 101   | 30       | 53  | 22  | 105   | 89                      | 113 | 0.56 | 113      | 97  | 0.46 | 6         | 0.874    |
| Rani et al.         | 2017 | India   | Asian     | 377         | 15           | 120 | 42  | 177   | 72       | 86  | 42  | 200   | 150                     | 204 | 0.58 | 230      | 170 | 0.43 | 6         | 0.089    |
| Chen et al.         | 2017 | China   | Asian     | 184         | 17           | 29  | 18  | 64    | 51       | 57  | 12  | 120   | 63                      | 65  | 0.51 | 159      | 81  | 0.34 | 6         | 0.496    |

Abbreviations: D, mutant type; I, wildtype; n, number; RAF, risk allele frequency; risk allele, D allele.

**Table 2** The characteristics of included studies and ACE rs4646994 polymorphism genotype distribution and allele frequency of HCM in case and control groups

| Author              | Year | Country   | Ethnicity | Sample size | Genotype (n) |     |    |       |          |     |     |       | Allele frequency (n, %) |      |      |          |      |      | NOS score | HWE test |
|---------------------|------|-----------|-----------|-------------|--------------|-----|----|-------|----------|-----|-----|-------|-------------------------|------|------|----------|------|------|-----------|----------|
|                     |      |           |           |             | Cases        |     |    |       | Controls |     |     |       | Cases                   |      |      | Controls |      |      |           |          |
|                     |      |           |           |             | II           | ID  | DD | Total | II       | ID  | DD  | Total | I                       | D    | RAF  | I        | D    | RAF  |           |          |
| Marian et al.       | 1993 | U.S.A.    | Caucasian | 206         | 7            | 49  | 44 | 100   | 22       | 46  | 38  | 106   | 63                      | 137  | 0.69 | 90       | 122  | 0.58 | 6         | 0.778    |
| Yamada et al.       | 1997 | Japan     | Asian     | 193         | 31           | 32  | 8  | 71    | 50       | 55  | 17  | 122   | 94                      | 48   | 0.34 | 155      | 89   | 0.36 | 6         | 0.667    |
| Moiseev et al.      | 1997 | Russia    | Caucasian | 181         | 2            | 5   | 6  | 13    | 33       | 55  | 80  | 168   | 9                       | 17   | 0.65 | 121      | 215  | 0.64 | 6         | 0.315    |
| Lopez-Haldon et al. | 1999 | Spain     | Caucasian | 309         | 2            | 13  | 25 | 40    | 33       | 125 | 111 | 269   | 17                      | 63   | 0.79 | 191      | 347  | 0.64 | 6         | 0.952    |
| Cai et al.          | 2000 | China     | Asian     | 101         | 16           | 16  | 13 | 45    | 26       | 23  | 7   | 56    | 48                      | 0.47 | 75   | 37       | 0.33 | 6    | 0.528     |          |
| Gao et al.          | 2000 | China     | Asian     | 101         | 12           | 15  | 13 | 40    | 31       | 18  | 12  | 61    | 39                      | 41   | 0.51 | 80       | 42   | 0.34 | 6         | 0.185    |
| Yang et al.         | 2000 | China     | Asian     | 149         | 13           | 35  | 15 | 63    | 37       | 36  | 13  | 86    | 61                      | 65   | 0.52 | 110      | 62   | 0.36 | 6         | 0.86     |
| Li et al.           | 2001 | China     | Asian     | 96          | 13           | 19  | 1  | 33    | 28       | 23  | 12  | 63    | 45                      | 21   | 0.32 | 79       | 47   | 0.37 | 6         | 0.001    |
| Ogimoto et al.      | 2002 | Turkey    | Caucasian | 343         | 53           | 64  | 21 | 138   | 83       | 95  | 27  | 205   | 170                     | 106  | 0.38 | 261      | 149  | 0.36 | 6         | 0.653    |
| Zou et al.          | 2003 | China     | Asian     | 66          | 5            | 7   | 1  | 13    | 28       | 20  | 5   | 53    | 17                      | 9    | 0.35 | 76       | 30   | 0.28 | 6         | 0.052    |
| Kawaguchi et al.    | 2003 | Japan     | Asian     | 168         | 26           | 41  | 13 | 80    | 43       | 28  | 17  | 88    | 93                      | 67   | 0.42 | 114      | 62   | 0.35 | 6         | 0.661    |
| Doolan et al.       | 2004 | Australia | Caucasian | 236         | 10           | 14  | 12 | 36    | 48       | 94  | 58  | 200   | 34                      | 38   | 0.53 | 190      | 210  | 0.52 | 6         | 0.147    |
| Rai et al.          | 2008 | India     | Asian     | 282         | 11           | 63  | 44 | 118   | 47       | 87  | 30  | 164   | 85                      | 151  | 0.64 | 181      | 147  | 0.45 | 6         | 0.048    |
| Kaya et al.         | 2010 | Turkey    | Asian     | 83          | 8            | 34  | 21 | 63    | 5        | 9   | 6   | 20    | 50                      | 76   | 0.6  | 19       | 21   | 0.52 | 6         | 0.661    |
| Coto et al.         | 2010 | Spain     | Caucasian | 507         | 35           | 100 | 72 | 207   | 46       | 135 | 119 | 300   | 170                     | 244  | 0.59 | 227      | 373  | 0.62 | 6         | 0.147    |
| Rani et al.         | 2017 | India     | Asian     | 332         | 16           | 89  | 27 | 132   | 72       | 86  | 42  | 200   | 121                     | 143  | 0.54 | 230      | 170  | 0.43 | 6         | 0.048    |

Abbreviations: D, mutant type; I, wildtype; n, number; RAF, risk allele frequency; risk allele, D allele.

NOS score of each study was more than 6, and therefore, the quality was good. The results are shown in Tables 1 and 2.

## Association between ACE rs4646994 polymorphism and susceptibility to DCM

Our meta-analysis showed that potential heterogeneity was found in all five genetic models (allele model:  $I^2$ : 69.6%; homozygous gene model:  $I^2$ : 71.7%; heterozygous gene model:  $I^2$ : 74.3%; dominant gene model:  $I^2$ : 74%; recessive gene model:  $I^2$ : 64.3%). Therefore, a random-effects model was used in the meta-analysis (Figure 2). The results of the study on the association between ACE rs4646994 polymorphism and the pathogenesis of DCM showed that allele gene model (D vs. I): OR = 1.39, 95% CI = 1.14–1.69,  $P=0.001$ ; homozygote gene model (DD vs. II): OR = 2.02, 95% CI = 1.32–3.09,  $P=0.001$ ; heterozygote gene model (ID vs. II): OR = 1.46, 95% CI = 1.01–2.12,  $P=0.045$ ; dominance gene model (ID+DD vs. II): OR = 1.62, 95% CI = 1.14–2.29,  $P=0.006$ ; recessive gene model (DD vs. ID and II): OR = 1.53, 95% CI = 1.12–2.08,  $P=0.007$ . In summary, our meta-analysis showed that there was a significant association between ACE rs4646994 polymorphism and DCM in the five gene models. It can be concluded that the D allele and DD genotype of ACE rs4646994 polymorphism may be the genetic risk factors of DCM.

We try to determine more reliable results and explore the sources of heterogeneity by analyzing different subgroups. First of all, a subgroup analysis was carried out on the ethnicity (Asian race and White race). As shown in Table 3, the results show that four gene models of Asian race suggest that there is a significant association between ACE rs4646994 polymorphism and DCM (allele gene model: OR = 1.47, 95% CI = 1.21–1.78,  $P<0.001$ ; homozygous gene model: OR = 2.28, 95% CI = 1.49–3.47,  $P<0.001$ ; dominant gene model: OR = 1.72, 95% CI = 1.12–2.64,  $P=0.01$ ; recessive gene model: OR = 1.67, 95% CI = 1.16–2.39,  $P=0.05$ ). However, no association was shown between the Asian heterozygous gene model (heterozygous gene model: OR = 1.51, 95% CI = 0.91–2.50,  $P=0.11$ ) and the white subgroup (allele gene model: OR = 1.25, 95% CI = 0.85–1.84,  $P=0.27$ ; homozygous gene model: OR = 1.61, 95% CI = 0.70–3.67,  $P=0.26$ ; Heterozygous gene model: OR = 1.27, 95% CI = 0.77–2.10,  $P=0.35$ ; dominant gene model: OR = 1.40, 95% CI = 0.78–2.51,  $P=0.26$ ; recessive gene model: OR = 1.29, 95% CI = 0.74–2.24,  $P=0.37$ ). The results showed that the mutation of ACE gene significantly increased the risk of DCM in Asian population. Although there was no statistical significance between the mutation of ACE gene and the incidence of DCM in white population, it had a tendency to increase the risk of DCM. We conducted a subgroup analysis of the sample size, and the subgroup analysis of the sample size > 200 showed that there was an association between ACE rs4646994 polymorphism and the DCM risk of the three gene models (allele gene model: OR = 1.35, 95% CI = 1.07–1.70,  $P=0.01$ ; homozygous gene model: OR = 1.97, 95% CI = 1.17–3.30,  $P=0.01$ ; recessive gene model: OR = 1.47, 95% CI = 1.04–2.08,  $P=0.03$ ). In the subgroup with sample size  $\leq 200$ , this relationship disappeared (allele gene model: OR = 1.49, 95% CI = 1.00–2.23,  $P=0.05$ ; homozygous gene model: OR = 2.16, 95% CI = 0.95–4.90,  $P=0.06$ ; heterozygous gene model: OR = 1.40, 95% CI = 0.98–2.00,  $P=0.07$ ; recessive gene model: OR = 1.66, 95% CI = 0.81–3.40,  $P=0.16$ ).

In order to further determine the reliability of the results, through cumulative meta-analysis, we find that the more stable the association between ACE rs4646994 polymorphism and the incidence of DCM is as the year of publication approaches (Figure 3). It indicates that the results of this meta-analysis are very reliable.

## Association between ACE rs4646994 polymorphism and susceptibility to HCM

Our meta-analysis showed that there was a significant association between ACE rs4646994 polymorphism and HCM in four genetic models: allele gene model (D vs. I): OR = 1.36, 95% CI = 1.13–1.63,  $P=0.001$ ; homozygous gene model (DD vs. II): OR = 1.80, 95% CI = 1.21–2.67,  $P=0.003$ ; heterozygous gene model (ID vs. II): OR = 1.76, 95% CI = 1.29–2.40,  $P<0.001$ ; dominant gene model (ID+DD vs. II): OR = 1.77, 95% CI = 1.30–2.41,  $P<0.001$ . The difference is that the recessive gene model (DD vs. ID and II): OR = 1.28, 95% CI = 0.99–1.67,  $P=0.064$  shows that ACE gene mutation has nothing to do with HCM. However, the trend of increasing risk can still be seen. The results of the forest plot are shown in Figure 4.

In order to determine more reliable results and explore the source of heterogeneity, we conducted a subgroup analysis. First of all, we conducted a subgroup analysis of ethnicity, and Table 4 showed that the mutation of ACE gene was not associated with the incidence of HCM in White population (allele gene model: OR = 1.19, 95% CI = 0.91–1.54,  $P=0.02$ ; homozygous gene model: OR = 1.40, 95% CI = 0.83–2.35,  $P=0.212$ ; heterozygous gene model: OR = 1.18, 95% CI = 0.81–1.74,  $P=0.39$ ; dominant gene model: OR = 1.25, 95% CI = 0.82–1.91,  $P=0.29$ ; recessive gene model: OR = 1.21, 95% CI = 0.87–1.68,  $P=0.26$ ). Although the recessive gene model (OR = 1.31, 95% CI = 0.87–1.97,  $P=0.20$ ) analysis in Asian population showed that there was no association between ACE rs4646994

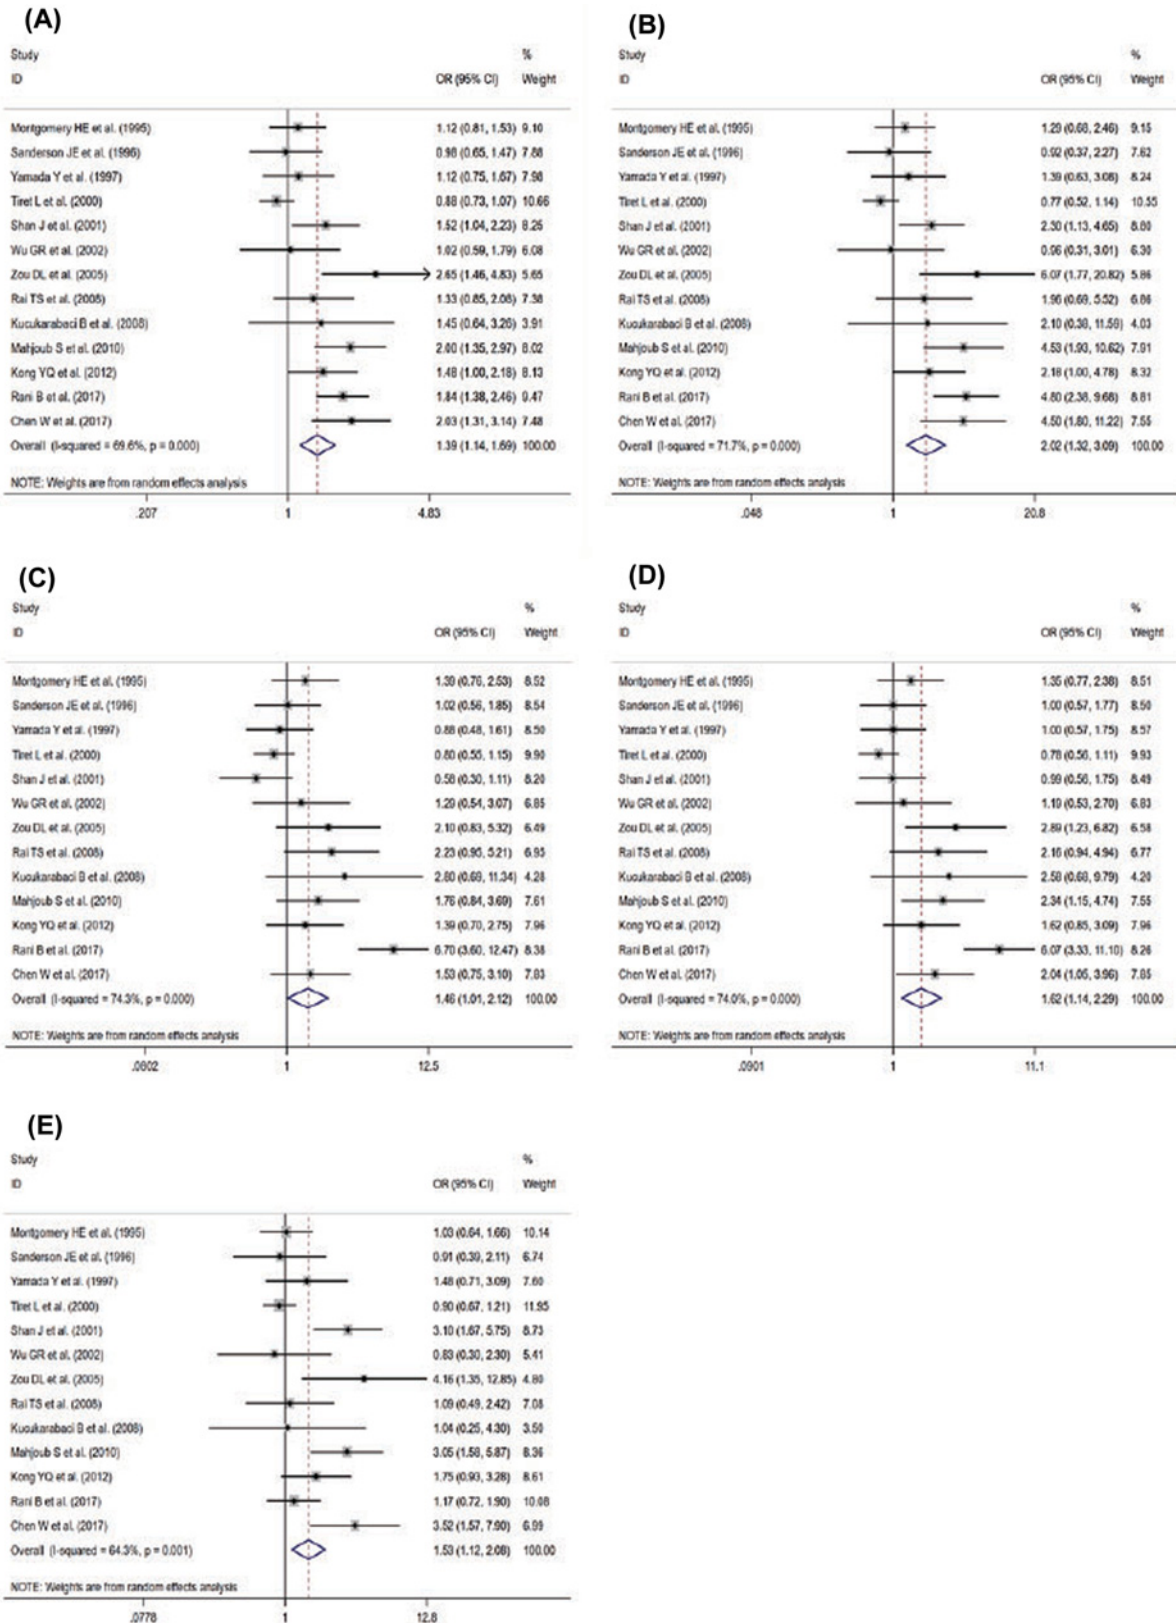

**Figure 2.** Forest plot from the meta-analysis on the association of ACE rs4646994 gene polymorphism and DCM risk (A) Allele; (B) homozygote; (C) heterozygote; (D) dominant; and (E) recessive.

**Table 3** Subgroup analysis of association between ACE I/D gene polymorphism and DCM

|             | Number of studies | Allele comparison D vs. I |           |        |                    |                      | Homozygous DD vs. II |           |        |                    |                      | Heterozygous ID vs. II |           |      |                    |                      | Dominant ID + DD vs. II |           |      |                    |                      | Recessive DD vs. ID + II |           |      |                    |                      |  |
|-------------|-------------------|---------------------------|-----------|--------|--------------------|----------------------|----------------------|-----------|--------|--------------------|----------------------|------------------------|-----------|------|--------------------|----------------------|-------------------------|-----------|------|--------------------|----------------------|--------------------------|-----------|------|--------------------|----------------------|--|
|             |                   | OR                        | 95% CI    | P      | I <sup>2</sup> (%) | P for I <sup>2</sup> | OR                   | 95% CI    | P      | I <sup>2</sup> (%) | P for I <sup>2</sup> | OR                     | 95% CI    | P    | I <sup>2</sup> (%) | P for I <sup>2</sup> | OR                      | 95% CI    | P    | I <sup>2</sup> (%) | P for I <sup>2</sup> | OR                       | 95% CI    | P    | I <sup>2</sup> (%) | P for I <sup>2</sup> |  |
|             |                   | Total                     | 13        |        |                    |                      |                      |           |        |                    |                      |                        |           |      |                    |                      |                         |           |      |                    |                      |                          |           |      |                    |                      |  |
| Ethnicity   |                   |                           |           |        |                    |                      |                      |           |        |                    |                      |                        |           |      |                    |                      |                         |           |      |                    |                      |                          |           |      |                    |                      |  |
| Asian       | 9                 | 1.47                      | 1.21–1.78 | <0.001 | 48.5               | 0.05                 | 2.28                 | 1.49–3.47 | <0.001 | 51.1               | 0.04                 | 1.51                   | 0.91–2.50 | 0.11 | 78.2               | <0.001               | 1.72                    | 1.12–2.64 | 0.01 | 73.7               | <0.001               | 1.67                     | 1.12–2.39 | 0.05 | 52.2               | 0.03                 |  |
| Caucasian   | 4                 | 1.25                      | 0.85–1.84 | 0.27   | 78.4               | 0.003                | 1.61                 | 0.70–3.67 | 0.26   | 79.4               | 0.002                | 1.27                   | 0.77–2.10 | 0.35 | 55.7               | 0.08                 | 1.4                     | 0.87–2.51 | 0.26 | 70.4               | 0.018                | 1.29                     | 0.74–2.24 | 0.37 | 73                 | 0.01                 |  |
| Sample size |                   |                           |           |        |                    |                      |                      |           |        |                    |                      |                        |           |      |                    |                      |                         |           |      |                    |                      |                          |           |      |                    |                      |  |
| >200        | 8                 | 1.35                      | 1.07–1.70 | 0.01   | 74                 | <0.001               | 1.97                 | 1.17–3.30 | 0.01   | 77.2               | <0.001               | 1.43                   | 0.84–2.46 | 0.19 | 83.9               | <0.001               | 1.6                     | 0.99–2.59 | 0.06 | 82.4               | <0.001               | 1.47                     | 1.04–2.08 | 0.03 | 68.4               | 0.002                |  |
| ≤200        | 5                 | 1.49                      | 1.00–2.23 | 0.05   | 64.5               | 0.02                 | 2.16                 | 0.95–4.90 | 0.06   | 62                 | <0.001               | 1.4                    | 0.98–2.00 | 0.07 | 0                  | 0.584                | 1.62                    | 1.06–2.49 | 0.03 | 32.8               | <0.001               | 1.66                     | 0.81–3.40 | 0.16 | 60                 | 0.04                 |  |

Abbreviation: I/D, insertion/deletion.



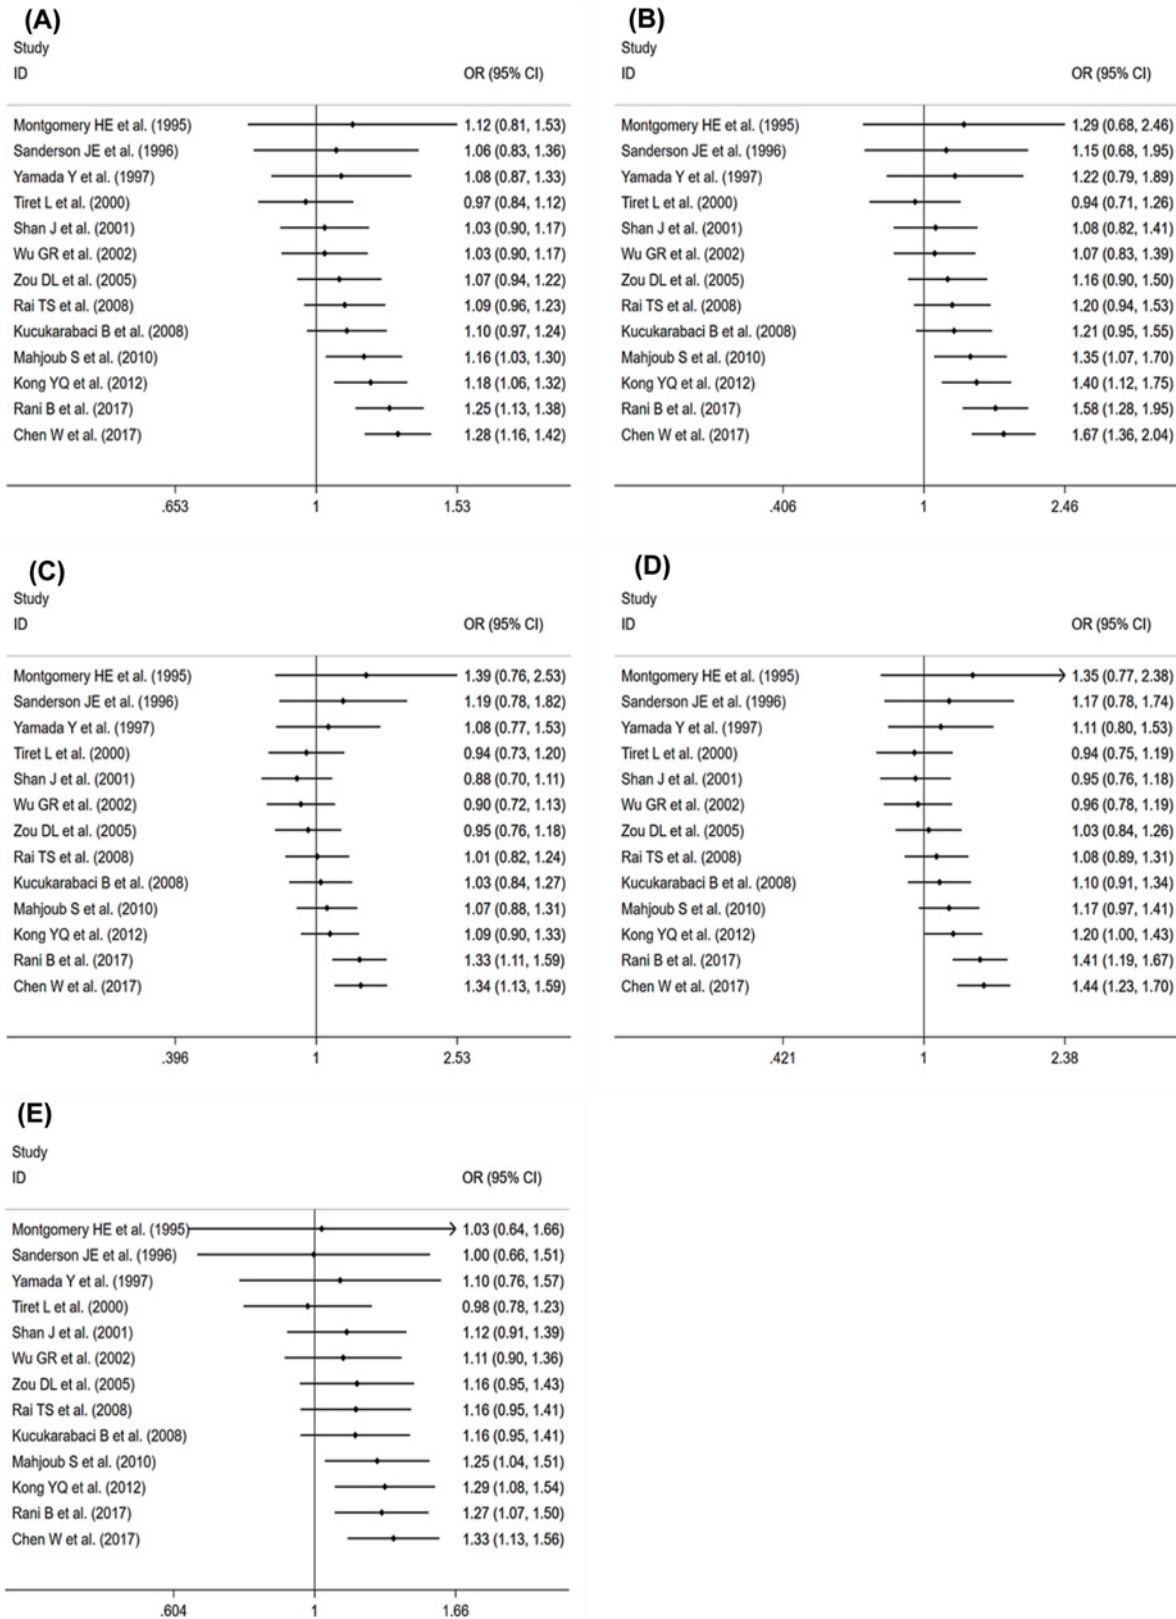

**Figure 3. The cumulative meta-analysis of the association of ACE rs4646994 gene polymorphism and DCM risk (A) Allele; (B) homozygote; (C) heterozygote; (D) dominant; and (E) recessive.**

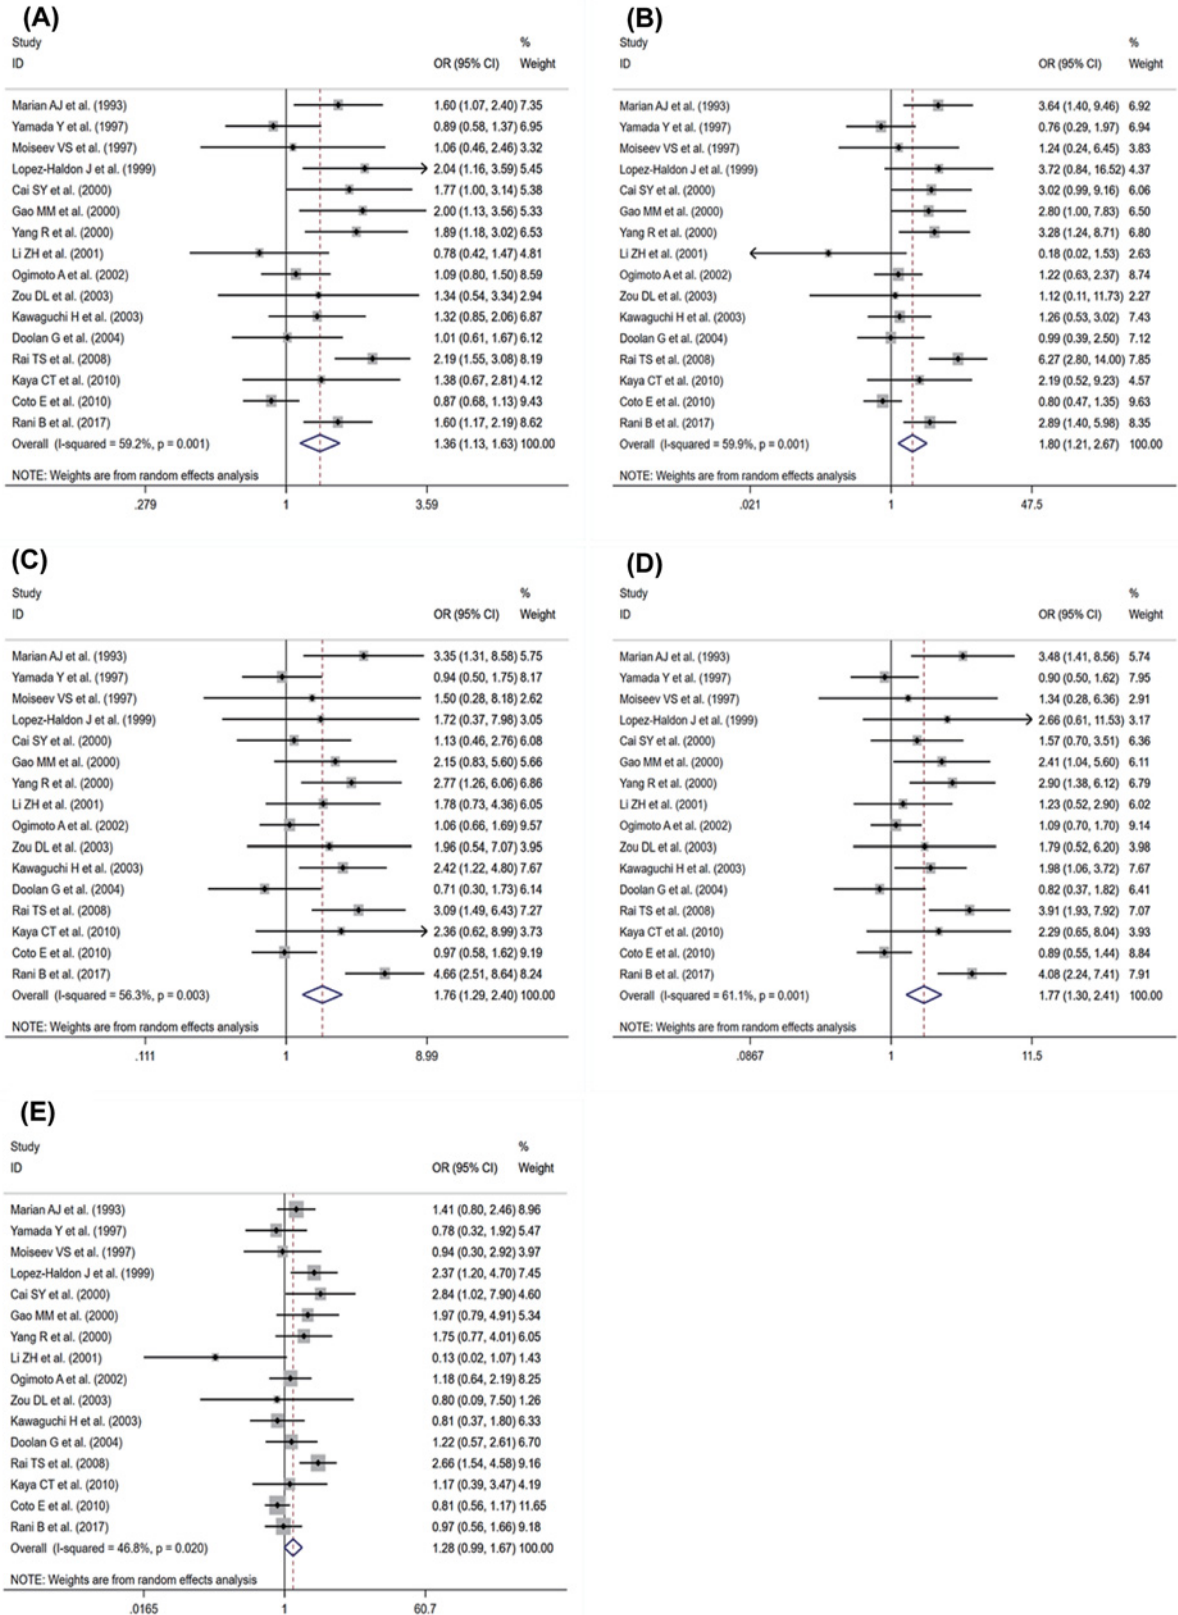

**Figure 4.** Forest plot from the meta-analysis on the association of ACE rs4646994 gene polymorphism and HCM risk (A) allele; (B) homozygote; (C) heterozygote; (D) dominant; and (E) recessive.

**Table 4** Subgroup analysis of association between ACE I/D gene polymorphism and HCM

|             | Number of studies | Allele comparison D vs. I |           |        |                    |                      | Homozygous DD vs. I |           |       |                    |                      | Heterozygous ID vs. II |           |        |                    |                      | Dominant ID + DD vs. II |           |        |                    |                      | Recessive DD vs. ID + II |           |      |                    |                      |
|-------------|-------------------|---------------------------|-----------|--------|--------------------|----------------------|---------------------|-----------|-------|--------------------|----------------------|------------------------|-----------|--------|--------------------|----------------------|-------------------------|-----------|--------|--------------------|----------------------|--------------------------|-----------|------|--------------------|----------------------|
|             |                   | OR                        | 95% CI    | P      | I <sup>2</sup> (%) | P for I <sup>2</sup> | OR                  | 95% CI    | P     | I <sup>2</sup> (%) | P for I <sup>2</sup> | OR                     | 95% CI    | P      | I <sup>2</sup> (%) | P for I <sup>2</sup> | OR                      | 95% CI    | P      | I <sup>2</sup> (%) | P for I <sup>2</sup> | OR                       | 95% CI    | P    | I <sup>2</sup> (%) | P for I <sup>2</sup> |
|             |                   | Total                     | 16        |        |                    |                      |                     |           |       |                    |                      |                        |           |        |                    |                      |                         |           |        |                    |                      |                          |           |      |                    |                      |
| Ethnicity   |                   |                           |           |        |                    |                      |                     |           |       |                    |                      |                        |           |        |                    |                      |                         |           |        |                    |                      |                          |           |      |                    |                      |
| Asian       | 10                | 1.49                      | 1.20–1.85 | <0.001 | 47                 | 0.05                 | 2.09                | 1.25–3.50 | 0.005 | 55.3               | 0.02                 | 2.15                   | 1.51–3.06 | <0.001 | 45.3               | 0.06                 | 2.11                    | 1.48–3.00 | <0.001 | 51.7               | 0.03                 | 1.31                     | 0.87–1.97 | 0.20 | 51.4               | 0.03                 |
| Caucasian   | 6                 | 1.19                      | 0.91–1.54 | 0.20   | 55.3               | 0.05                 | 1.4                 | 0.83–2.35 | 0.212 | 49.8               | 0.08                 | 1.18                   | 0.81–1.74 | 0.39   | 28.3               | 0.22                 | 1.25                    | 0.82–1.91 | 0.29   | 44.3               | 0.11                 | 1.21                     | 0.87–1.68 | 0.26 | 40.3               | 0.14                 |
| Sample size |                   |                           |           |        |                    |                      |                     |           |       |                    |                      |                        |           |        |                    |                      |                         |           |        |                    |                      |                          |           |      |                    |                      |
| >200        | 7                 | 1.39                      | 1.05–1.84 | 0.02   | 76.4               | <0.001               | 2.06                | 1.10–3.87 | 0.02  | 76.9               | <0.001               | 1.78                   | 1.00–3.15 | 0.05   | 77.8               | <0.001               | 1.89                    | 1.06–3.36 | 0.03   | 80.3               | <0.001               | 1.36                     | 0.95–1.94 | 0.10 | 64.9               | 0.01                 |
| ≤200        | 9                 | 1.33                      | 1.06–1.68 | 0.02   | 29.5               | 0.18                 | 1.61                | 0.99–2.64 | 0.06  | 30.7               | 0.17                 | 1.71                   | 1.27–2.30 | <0.001 | 0                  | 0.50                 | 1.65                    | 1.25–2.19 | <0.001 | 2.8                | 0.41                 | 1.18                     | 0.78–1.79 | 0.44 | 28.3               | 0.19                 |

Abbreviation: I/D, insertion/deletion.

polymorphism and the incidence of HCM, there was a significant association among the other four models (allele gene model: OR = 1.49, 95% CI = 1.20–1.85,  $P < 0.001$ ; homozygous gene model: OR = 2.09, 95% CI = 1.25–3.50,  $P = 0.005$ ; heterozygous gene model: OR = 2.15, 95% CI = 1.51–3.06,  $P < 0.001$ ; dominant gene model: OR = 2.11, 95% CI = 1.48–3.00,  $P < 0.001$ ). Therefore, the mutation of ACE gene is associated with the increased incidence of HCM in Asian population. Then we made a subgroup analysis of the sample size. The results of subgroup analysis with sample size  $> 200$  showed that there were three gene models suggesting that the mutation of ACE gene was associated with the pathogenesis of HCM (allele gene model: OR = 1.39, 95% CI = 1.05–1.84,  $P = 0.02$ ; homozygous gene model: OR = 2.06, 95% CI = 1.10–3.87,  $P = 0.02$ ; dominant gene model: OR = 1.89, 95% CI = 1.06–3.36,  $P = 0.03$ ), while the other two showed nothing to do with it (heterozygous gene model: OR = 1.78, 95% CI = 1.00–3.15,  $P = 0.05$ ; recessive gene model: OR = 1.36, 95% CI = 0.95–1.94,  $P = 0.10$ ). Similarly, the results in the subgroup with sample size  $\leq 200$  also showed that there was an association among the three gene models (allele gene model: OR = 1.33, 95% CI = 1.06–1.68,  $P = 0.02$ ; heterozygous gene model: OR = 1.71, 95% CI = 1.27–2.30,  $P < 0.001$ ; dominant gene model: OR = 1.71, 95% CI = 1.27–2.30,  $P < 0.001$ ), while there was no such phenomenon in the other two gene models (homozygous gene model: OR = 1.61, 95% CI = 0.99–2.64,  $P = 0.06$ ; recessive gene model: OR = 1.18, 95% CI = 0.78–1.79,  $P = 0.44$ ).

As shown in Figure 5, through cumulative meta-analysis, we found that with the passage of time of the five gene models, the more stable the association between ACE rs4646994 polymorphism and the risk factors of HCM.

## Sensitivity analysis

We conducted the sensitivity analysis to assess whether omitting each study would change the overall ORs. As shown in Supplementary Figures S1 and S2, none of the studies would change the results of our meta-analysis, which showed that our results were reliable.

## Publication bias

The Begg's funnel plots associated with the above analyses are presented in Supplementary Figure S3 and S4. From the Begg's funnel plot, it can be seen that there was no obvious asymmetry in each meta-analysis, thus indicating that there was no publication bias in our study. We performed Egger's test to further validate the above conclusion (DCM: allele model:  $P = 0.068$ ; homozygote model:  $P = 0.051$ ; heterozygote model:  $P = 0.121$ ; dominant model:  $P = 0.040$ ; and recessive model:  $P = 0.079$ . HCM: allele model:  $P = 0.472$ ; homozygote model:  $P = 0.678$ ; heterozygote model:  $P = 0.343$ ; dominant model:  $P = 0.087$ ; and recessive model:  $P = 0.897$ ).

## Discussion

In this meta-analysis, we critically reviewed all eligible published studies that met the inclusion and exclusion criteria to evaluate the association between ACE rs4646994 polymorphisms and the risk of DCM/HCM. There were 13 studies regarding DCM and 16 on HCM. Our findings suggest that ACE rs4646994 polymorphisms may be associated with both HCM and DCM.

Polymorphisms in the ACE gene, encoding one of the components of the renin–angiotensin–aldosterone system (RAAS), have been found to be associated with a variety of cardiovascular diseases, such as hypertension, myocardial infarction, and cardiomyopathy [39,40]. Increased synthesis of angiotensin II induces cell proliferation, migration, and hypertrophy and can enhance proinflammatory cytokine and matrix metalloproteinase production. Studies have shown that the anatomical features of HCM are characterized by asymmetric hypertrophy of the ventricles, whereas DCM is a class of cardiomyopathies characterized by systolic dysfunction of the left ventricle or biventricular enlargement class. Meanwhile, aldosterone production is regulated by the renin–angiotensin system, and studies have shown that it has a direct effect on the heart, including recurrent cardiac hypertrophy and fibrosis, ultimately leading to cardiac remodeling [41,42]. Therefore, ACE rs4646994 polymorphisms provisionally play an important role in the pathogenesis of HCM/DCM cardiomyopathy. While the results of our meta-analysis revealed that ACE rs4646994 polymorphism was associated with the risk of DCM/HCM incidence, providing a rationale of genetic aspects for the treatment of DCM/HCM.

Our subgroup analysis showed that ACE gene mutations can increase the risk of DCM and HCM in Asian population, while no such results were obtained for Caucasian population. The above results suggest an association between the risk of incident DCM and HCM and the race. In addition, the population may be the source of heterogeneity because the heterogeneity was reduced in the subgroup analysis of the population. In the subgroup analysis with a dividing line of sample size 200, we found that the association of ACE gene mutations with the risk of DCM incidence was shown in the subgroup analysis with a sample size greater than 200 in DCM but not in the subgroup analysis with

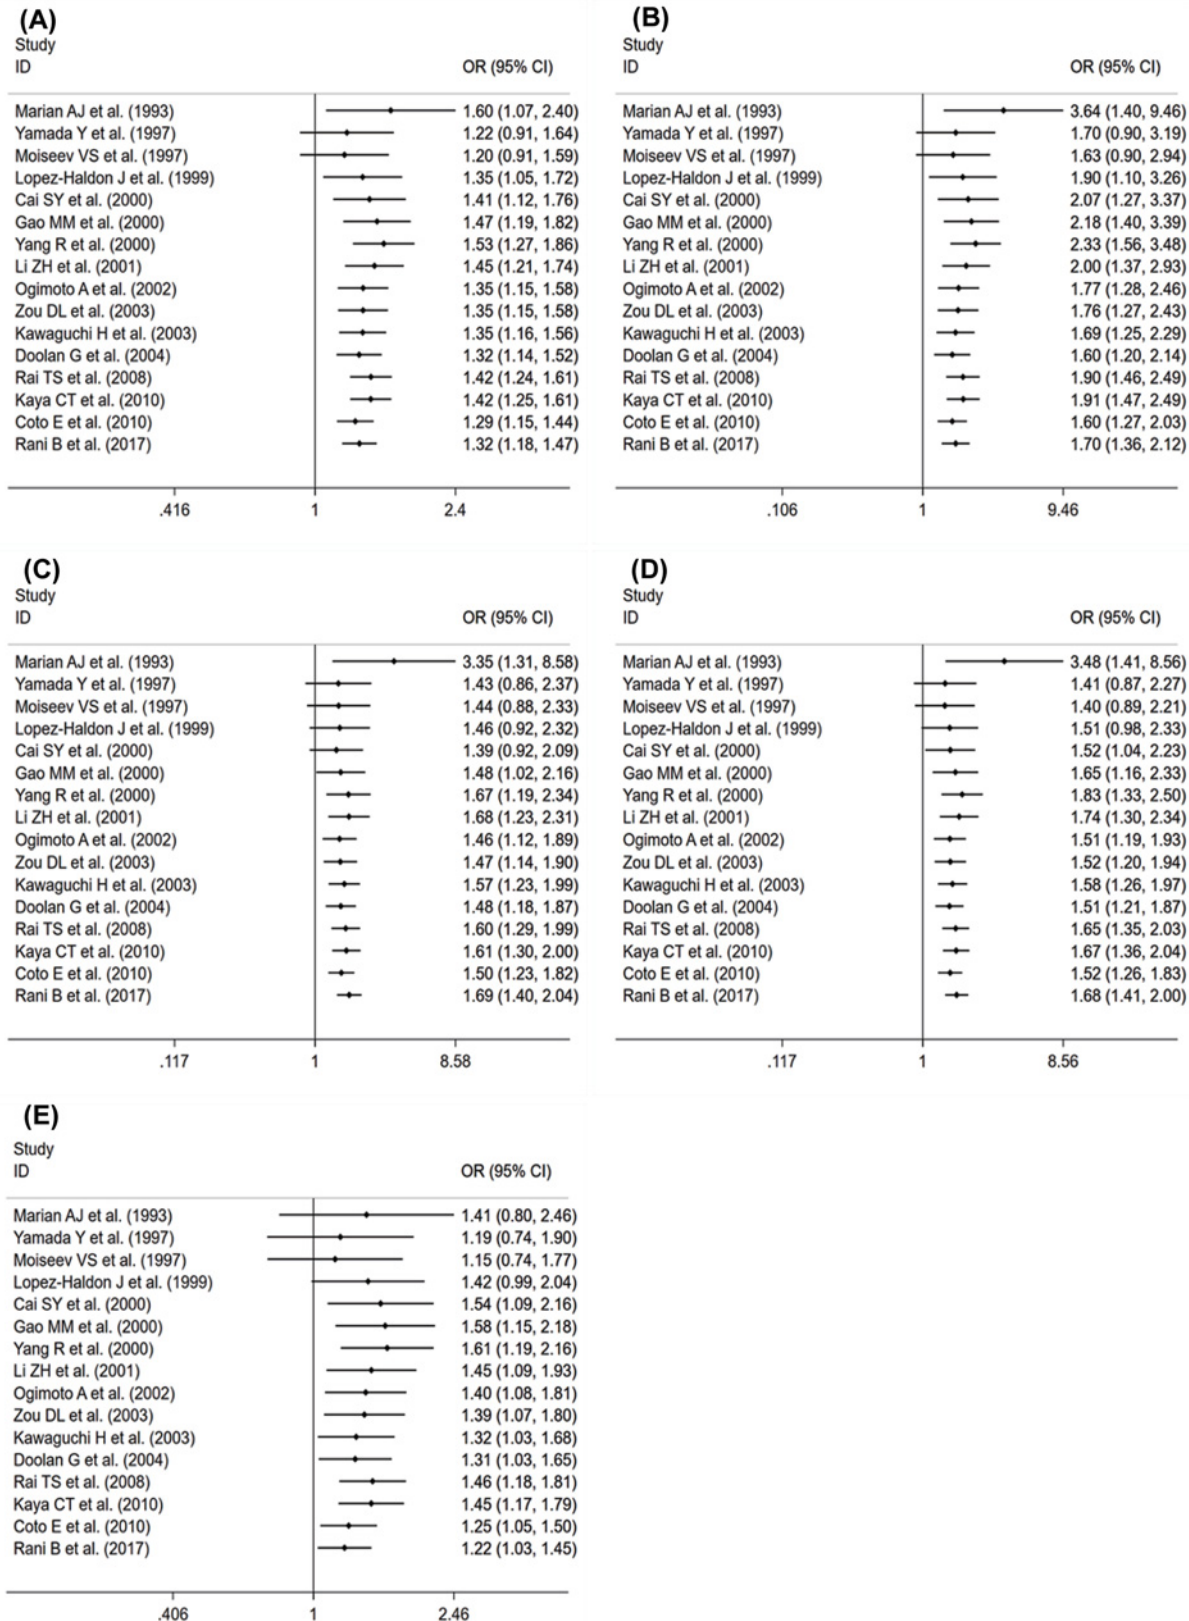

**Figure 5.** The cumulative meta-analysis on the association of ACE rs4646994 gene polymorphism and HCM risk (A) Allele; (B) homozygote; (C) heterozygote; (D) dominant; and (E) recessive.

less than 200. Therefore, we believe that a larger sample size is needed for the association of DCM with ACE gene mutations to confirm the reliability of the results. Whereas in HCM the analysis of a subsample size, both showed an association of ACE gene mutations with the onset of HCM. The results of our time-series analyses all showed a stable relationship between ACE gene mutations and the risk of incident DCM/HCM. None of the studies could change the meta-analysis results in the sensitivity analysis (Supplementary Figures S1 and S2). No publication bias was found in our study (Supplementary Figures S3 and S4).

There are certain limitations to our study. First, we failed to group familial DCM/HCM and sporadic DCM/HCM due to limited data. Second, most of our reference studies had small sample sizes, which may affect the results of the meta-analysis. Third, the ethnic distribution of our included studies was relatively single, only Caucasian and Asian ethnicities were included, and subgroup analysis could not be performed for all ethnic populations. Besides, heterogeneity due to differences in the regression models of the included studies could not be avoided due to unavailability of specific information. The review protocol of the present study was not pre-registered with PROSPERO.

## Conclusion

This meta-analysis showed an association between the onset of HCM/DCM and ACE rs4646994 polymorphism. The findings of the current study may contribute to stratification strategies for patients with HCM/DCM. In addition, these results also show the potential possibility to treat HCM/DCM by modulating the RAAS system function in patients.

## Data Availability

The datasets used and/or analyzed during the current study are available from the corresponding authors on reasonable request.

## Competing Interests

The authors declare that there are no competing interests associated with the manuscript.

## Funding

This work was supported by grants from National Natural Science Foundation of China [grant number 81873486]; Suzhou "Promoting Health through Science and Education" Youth Science and Technology Project [grant number KJXW2020001]; Medical research project of Jiangsu Provincial Health Commission [grant number Z2021011]; Biomedical translational medicine innovation and applied research project [grant number SZM2021020]; Project of Suzhou Science and Technology Development Program-Applied Basic Research [grant number SKJYD2021045]; Suzhou Medical Health Science and technology innovation project [grant number SKY2021002].

The funders had no roles in study design, data collection and analysis, decision to publish, or preparation of the manuscript.

## CRedit Author Contribution

**Jinsheng Shen:** Conceptualization, Data curation, Software, Formal analysis, Investigation, Visualization, Methodology, Writing—original draft. **Xuesong Qian:** Conceptualization, Data curation, Software, Formal analysis, Investigation, Visualization, Writing—original draft. **Xiaofei Mei:** Conceptualization, Data curation, Software, Formal analysis, Investigation, Visualization, Writing—original draft. **Jialu Yao:** Resources, Formal analysis, Validation, Investigation. **Hezi Jiang:** Conceptualization, Resources, Data curation, Software, Investigation, Visualization. **Kexin Li:** Conceptualization, Data curation, Software, Formal analysis, Investigation, Visualization. **Tan Chen:** Conceptualization, Resources, Data curation, Software, Investigation, Writing—review & editing. **Yufeng Jiang:** Conceptualization, Formal analysis, Supervision, Funding acquisition, Validation, Visualization, Methodology, Writing—review & editing. **Yafeng Zhou:** Conceptualization, Supervision, Funding acquisition, Validation, Methodology, Project administration, Writing—review & editing.

## Ethics Approval

Ethics approval was not needed because this is a meta-analysis.

## Abbreviations

ACE, angiotensin-converting enzyme; DCM, dilated cardiomyopathy; HCM, hypertrophic cardiomyopathy; HWE, Hardy–Weinberg equilibrium; LVH, left ventricular hypertrophy; NOS, Newcastle–Ottawa Scale; OR, odds ratio; RAAS, renin–angiotensin–aldosterone system; 95% CI, 95% confidence interval

## References

- Olsen, E.J.G., Oakley, C.M., Brandenburg, R.O et al. (1980) Report of the WHO/ISFC task force on the definition and classification of cardiomyopathies. *Br. Heart. J.* **44**, 672–673, <https://doi.org/10.1136/hrt.44.6.672>
- Richardson, P., McKenna, W., Bristow, M. et al. (1996) Report of the 1995 World Health Organization/International Society and Federation of Cardiology Task Force on the Definition and Classification of cardiomyopathies. *Circulation* **93**, 841–842, <https://doi.org/10.1161/01.CIR.93.5.841>
- Maron, B.J., Towbin, J.A., Thiene, G. et al. (2006) Contemporary definitions and classification of the cardiomyopathies: an American Heart Association Scientific Statement from the Council on Clinical Cardiology, Heart Failure and Transplantation Committee; Quality of Care and Outcomes Research and Functional Genomics and Translational Biology Interdisciplinary Working Groups; and Council on Epidemiology and Prevention. *Circulation* **113**, 1807–1816, <https://doi.org/10.1161/CIRCULATIONAHA.106.174287>
- Michels, V.V., Moll, P.P., Miller, F.A. et al. (1992) The frequency of familial dilated cardiomyopathy in a series of patients with idiopathic dilated cardiomyopathy. *N. Engl. J. Med.* **326**, 77–82, <https://doi.org/10.1056/NEJM199201093260201>
- Kaufman, B.D., Auerbach, S., Reddy, S. et al. (2007) RAAS gene polymorphisms influence progression of pediatric hypertrophic cardiomyopathy. *Hum. Genet.* **122**, 515–523, <https://doi.org/10.1007/s00439-007-0429-9>
- Marian, A.J. and Roberts, R. (1995) Recent advances in the molecular genetics of hypertrophic cardiomyopathy. *Circulation* **92**, 1336–1347, <https://doi.org/10.1161/01.CIR.92.5.1336>
- van Spaendonck-Zwarts, K.Y., van Rijsingen, I.A., van den Berg, M.P. et al. (2013) Genetic analysis in 418 index patients with idiopathic dilated cardiomyopathy: overview of 10 years' experience. *Eur. J. Heart Fail.* **15**, 628–636, <https://doi.org/10.1093/eurjhf/hft013>
- Lim, G.B. (2016) Cardiomyopathies: tension between hypertrophic and dilated cardiomyopathies. *Nat. Rev. Cardiol.* **13**, 380–381, <https://doi.org/10.1038/nrcardio.2016.80>
- Bleumink, G.S., Schut, A.F., Sturkenboom, M.C., Deckers, J.W., van Duijn, C.M. and Stricker, B.H. (2004) Genetic polymorphisms and heart failure. *Genet. Med.* **6**, 465–474, <https://doi.org/10.1097/01.GIM.0000144061.70494.95>
- Keren, A., Syrris, P. and McKenna, W.J. (2008) Hypertrophic cardiomyopathy: the genetic determinants of clinical disease expression. *Nat. Clin. Pract. Cardiovasc. Med.* **5**, 158–168, <https://doi.org/10.1038/nccpcardio1110>
- Rigat, B., Hubert, C., Alhenc-Gelas, F., Cambien, F., Corvol, P. and Soubrier, F. (1990) An insertion/deletion polymorphism in the angiotensin I-converting enzyme gene accounting for half the variance of serum enzyme levels. *J. Clin. Invest.* **86**, 1343–1346, <https://doi.org/10.1172/JCI114844>
- Perkins, M.J., Van Driest, S.L., Ellsworth, E.G. et al. (2005) Gene-specific modifying effects of pro-LVH polymorphisms involving the renin-angiotensin-aldosterone system among 389 unrelated patients with hypertrophic cardiomyopathy. *Eur. Heart J.* **26**, 2457–2462, <https://doi.org/10.1093/eurheartj/ehi438>
- Rai, T.S., Dhandapani, P.S., Ahluwalia, T.S. et al. (2008) ACE I/D polymorphism in Indian patients with hypertrophic cardiomyopathy and dilated cardiomyopathy. *Mol. Cell. Biochem.* **311**, 67–72, <https://doi.org/10.1007/s11010-007-9695-z>
- Yang, J., Zhao, Y., Hao, P. et al. (2013) Impact of angiotensin I converting enzyme insertion/deletion polymorphisms on dilated cardiomyopathy and hypertrophic cardiomyopathy risk. *PLoS ONE* **8**, e63309, <https://doi.org/10.1371/journal.pone.0063309>
- Montgomery, H.E., Keeling, P.J., Goldman, J.H., Humphries, S.E., Talmud, P.J. and McKenna, W.J. (1995) Lack of association between the insertion/deletion polymorphism of the angiotensin-converting enzyme gene and idiopathic dilated cardiomyopathy. *J. Am. Coll. Cardiol.* **25**, 1627–1631, [https://doi.org/10.1016/0735-1097\(95\)00109-H](https://doi.org/10.1016/0735-1097(95)00109-H)
- Sanderson, J.E., Young, R.P., Yu, C.M., Chan, S., Critchley, J.A. and Woo, K.S. (1996) Lack of association between insertion/deletion polymorphism of the angiotensin-converting enzyme gene and end-stage heart failure due to ischemic or idiopathic dilated cardiomyopathy in the Chinese. *Am. J. Cardiol.* **77**, 1008–1010, [https://doi.org/10.1016/S0002-9149\(97\)89160-6](https://doi.org/10.1016/S0002-9149(97)89160-6)
- Yamada, Y., Ichihara, S., Fujimura, T. and Yokota, M. (1997) Lack of association of polymorphisms of the angiotensin converting enzyme and angiotensinogen genes with nonfamilial hypertrophic or dilated cardiomyopathy. *Am. J. Hypertens.* **10**, 921–928, [https://doi.org/10.1016/S0895-7061\(97\)00112-X](https://doi.org/10.1016/S0895-7061(97)00112-X)
- Tiret, L., Mallet, C., Poirier, O. et al. (2000) Lack of association between polymorphisms of eight candidate genes and idiopathic dilated cardiomyopathy: the CARDIGENE study. *J. Am. Coll. Cardiol.* **35**, 29–35, [https://doi.org/10.1016/S0735-1097\(99\)00522-7](https://doi.org/10.1016/S0735-1097(99)00522-7)
- Mahjoub, S., Mehri, S., Bousaada, R. et al. (2010) Association of ACE I/D polymorphism in Tunisian patients with dilated cardiomyopathy. *J. Renin Angiotensin Aldosterone Syst.* **11**, 187–191, <https://doi.org/10.1177/1470320310368874>
- Rani, B., Kumar, A., Bahl, A., Sharma, R., Prasad, R. and Khullar, M. (2017) Renin-angiotensin system gene polymorphisms as potential modifiers of hypertrophic and dilated cardiomyopathy phenotypes. *Mol. Cell. Biochem.* **427**, 1–11, <https://doi.org/10.1007/s11010-016-2891-y>
- Kucukarabaci, B., Birdane, A., Gunes, H.V. et al. (2008) Association between angiotensin converting enzyme (ACE) gene I/D polymorphism frequency and plasma ACE concentration in patients with idiopathic dilated cardiomyopathy. *Anadolu Kardiyol. Derg.* **8**, 65–66
- Shan, J., Li, Z., Ping, S. and Fu, G. (2001) Association between angiotensin converting enzyme gene polymorphism and dilated cardiomyopathy. *Zhong Hua Xin Xue Guan Bing Za Zhi* **29**, 286–288
- Wu, G., Ma, A., Ma, Z. and Geng, T. (2002) Relationship between dilated cardiomyopathy and angiotensin converting enzyme gene, chymase gene polymorphism. *J. Clin. Cardiol. (China)* **18**, 100–102
- Zou, D., Yuan, F., Guo, J., Jian, B. and Wu, K. (2003) Relationship between angiotensin converting enzyme gene polymorphism and hypertrophic and dilated cardiomyopathy. *J. Chin. Med. Univ.* **32**, 162–114
- Kong, Y., Yun, M. and Wang, Z. (2012) Association between ACE gene polymorphism and dilated cardiomyopathy in Han nationality. *China Trop. Med.* **12**, 623–624

- 26 Chen, W., Zhao, T., Chen, T., Liu, Y., Xiong, M. and Gui, Q. (2017) Relationship between ACE gene polymorphism and idiopathic dilated cardiomyopathy in southern Chinese Han population. *Shan Dong Yi Yao* **57**, 24–26
- 27 Marian, A.J., Yu, Q.T., Workman, R., Greve, G. and Roberts, R. (1993) Angiotensin-converting enzyme polymorphism in hypertrophic cardiomyopathy and sudden cardiac death. *Lancet* **342**, 1085–1086, [https://doi.org/10.1016/0140-6736\(93\)92064-Z](https://doi.org/10.1016/0140-6736(93)92064-Z)
- 28 Lopez-Haldon, J., Garcia-Lozano, J.R., Martinez Martinez, A., Nunez-Roldan, A. and Burgos Cornejo, J. (1999) The effect of polymorphisms of the angiotensin-converting enzyme and angiotensinogen genes on the phenotypic expression of Spanish patients with hypertrophic cardiomyopathy. *Med. Clin. (Barc.)* **113**, 161–163
- 29 Ogimoto, A., Hamada, M., Nakura, J., Miki, T. and Hiwada, K. (2002) Relation between angiotensin-converting enzyme II genotype and atrial fibrillation in Japanese patients with hypertrophic cardiomyopathy. *J. Hum. Genet.* **47**, 184–189, <https://doi.org/10.1007/s100380200021>
- 30 Kawaguchi, H. (2003) Angiotensin-converting enzyme and angiotensinogen gene polymorphism in hypertrophic cardiomyopathy. *Exp. Clin. Cardiol.* **8**, 155–159
- 31 Doolan, G., Nguyen, L., Chung, J., Ingles, J. and Semsarian, C. (2004) Progression of left ventricular hypertrophy and the angiotensin-converting enzyme gene polymorphism in hypertrophic cardiomyopathy. *Int. J. Cardiol.* **96**, 157–163, <https://doi.org/10.1016/j.ijcard.2004.05.003>
- 32 Kaya, C.T., Gurlek, A., Altin, T. et al. (2010) The relationship between angiotensin converting enzyme gene I/D polymorphism and QT dispersion in patients with hypertrophic cardiomyopathy. *J. Renin Angiotensin Aldosterone Syst.* **11**, 192–197, <https://doi.org/10.1177/1470320310368190>
- 33 Coto, E., Palacin, M., Martin, M. et al. (2010) Functional polymorphisms in genes of the Angiotensin and Serotonin systems and risk of hypertrophic cardiomyopathy: AT1R as a potential modifier. *J. Transl. Med.* **8**, 64, <https://doi.org/10.1186/1479-5876-8-64>
- 34 Moiseev, V.S., Demurov, L.M., Kobalava, Zh.D. et al. (1997) The polymorphism of the angiotensin-converting enzyme gene in patients with hypertension, left ventricular hypertrophy and the development of a myocardial infarct at a young age. Preliminary report. *Ter. Arkh.* **69**, 18–23
- 35 Cai, Y. and Wu, X. (2000) Relationship between angiotensin converting enzyme gene deletion polymorphism and left ventricular hypertrophy in patients with hypertrophic cardiomyopathy. *Zhe Jiang Yi Xue* **22**, 521–523
- 36 Gao, M., Xiao, B., Hu, D. et al. (2000) Distribution of angiotensin converting enzyme genotypes in patients with hypertrophic cardiomyopathy. *J. Capital Univ. Med. Sci.* **21**, 112–114
- 37 Yang, R., Zhang, F., Ma, W., Xie, Y. and Jia, Y. (2000) Angiotensin converting enzyme gene deletion polymorphism in patients with hypertrophic cardiomyopathy. *J. Nanjing Med. Univ.* **20**, 272–274
- 38 Li, Z., Ma, A., Wu, G. and Hui, N. (2001) Insertion of angiotensin converting enzyme gene/relationship between deletion polymorphism and hypertrophic cardiomyopathy. *J. Clin. Cardiol. (China)* **17**, 132–133
- 39 Kato, N., Tatara, Y., Ohishi, M. et al. (2011) Angiotensin-converting enzyme single nucleotide polymorphism is a genetic risk factor for cardiovascular disease: a cohort study of hypertensive patients. *Hypertens. Res.* **34**, 728–734, <https://doi.org/10.1038/hr.2011.28>
- 40 Zhang, H., Sun, M.L., Peng, J., Sun, T., Zhang, Y. and Yang, J.M. (2011) Association of the angiotensin type 1 receptor gene A1166C polymorphisms with myocardial infarction: a meta-analysis. *J. Thromb. Haemost.* **9**, 1258–1260, <https://doi.org/10.1111/j.1538-7836.2011.04273.x>
- 41 Brilla, C.G., Matsubara, L.S. and Weber, K.T. (1993) Anti-aldosterone treatment and the prevention of myocardial fibrosis in primary and secondary hyperaldosteronism. *J. Mol. Cell Cardiol.* **25**, 563–575, <https://doi.org/10.1006/jmcc.1993.1066>
- 42 Young, M., Fullerton, M., Dilley, R. and Funder, J. (1994) Mineralocorticoids, hypertension, and cardiac fibrosis. *J. Clin. Invest.* **93**, 2578–2583, <https://doi.org/10.1172/JCI117269>
